# Supplementary material
Source: PubMed Central journal article supplement (PMC4028140)
Supplement: NIHMS550688-supplement-01.pdf [file NIHMS550688-supplement-01.pdf]

## **Citations for the neurocognitive battery**

Trails B (Reitan and Wolfson, 1985), Stroop Color Word Test (Golden, 1978), Auditory Verbal Learning Task (AVLT) (Rey, 1964), Wisconsin Card Sort Test (WCS) (Heaton et al., 1993), semantic (category) fluency (Spreen and Strauss, 1998), Controlled Oral Word Association (FAS) Test of phonemic fluency (Spreen and Benton, 1969), the Continuous Performance Task (CPT) identical pairs version (Cornblatt et al., 1988), letter number sequencing (Gold et al., 1997), N-back (Dobbs and Rule, 1989), Trails A (Reitan and Wolfson, 1985).

## **Other assessment citations**

The Montgomery-Asberg Depression Rating Scale (MADRS) (Montgomery and Asberg, 1979). The Global Assessment of Functioning (GAF) (Hall, 1995). The Systematic Assessment For Treatment Emergent Events (Levine and Schooler, 1986).

- Cornblatt, B.A., Risch, N.J., Faris, G., Friedman, D., Erlenmeyerkimling, L., 1988. The Continuous Performance-Test, Identical Pairs Version (Cpt-Ip) .1. New findings about sustained attention in normal families. *Psychiatry Res.* 26, 223-238.
- Dobbs, A.R., Rule, B.G., 1989. Adult age differences in working memory. *Psychol Aging.* 4, 500-3.
- Gold, J.M., Carpenter, C., Randolph, C., Goldberg, T.E., Weinberger, D.R., 1997. Auditory working memory and Wisconsin Card Sorting Test performance in schizophrenia. *Arch Gen Psychiatry.* 54, 159-165.
- Golden, C., 1978. Stroop Color and Word Test: Manual for Clinical and Experimental Uses, Vol., Stoelting, Chicago.
- Hall, R.C., 1995. Global assessment of functioning. A modified scale [see comments]. *Psychosomatics.* 36, 267-75.
- Heaton, R.K., Chelune, G.J., Talley, J.L., Kay, G.G., Curtiss, G., 1993. Wisconsin Card Sorting Test, Manual, Vol., Psychological Assessment Resources, Odessa, Fla.
- Levine, J., Schooler, N.R., 1986. Strategies for analyzing side-effect data from SAFTEE - a workshop held Fall 1985 in Rockville, Maryland. *Psychopharmacol Bull.* 22, 343-343.
- Montgomery, S.A., Asberg, M., 1979. A new depression scale designed to be sensitive to change. *Br J Psychiatry.* 134, 382-9.
- Reitan, R.M., Wolfson, D., 1985. The Halstead-Reitan Neuropsychological Test Battery: Theory and Clinical Interpretation, Vol., Neuropsychology Press, Tuscon.
- Rey, R.A., 1964. L'examen clinique en psychologique, Vol., Presses Universitaires de France, Paris.
- Spreen, O., Benton, A.L., 1969. Neurosensory Center Comprehensive Examination for Aphasia (NCCEA), Vol., University of Victoria Neuropsychology Laboratory, Victoria.
- Spreen, O., Strauss, E., 1998. A compendium of neuropsychological tests: Administration, norms, and commentary 2nd edition, Vol., Oxford, New York.

**Supplemental Table 1** Baseline scores on cognition measures.

| Domain                       | Study                                       | Open-label               | Double-blind             |                          |
|------------------------------|---------------------------------------------|--------------------------|--------------------------|--------------------------|
|                              | Treatment                                   | Glycine<br>(n=10)        | Glycine<br>(n=4)         | Placebo<br>(n=4)         |
|                              | Measure                                     | Mean (SD)                | Mean (SD)                | Mean (SD)                |
| Processing speed             | Trails A <sup>a</sup>                       | 27.3 (12.6) <sup>1</sup> | 37.3 (3.8) <sup>4</sup>  | 38.5 (10.2)              |
|                              | Stroop colors                               | 64.9 (10.4) <sup>1</sup> | 56.7 (8.6) <sup>4</sup>  | 60.3 (17.9)              |
|                              | Stroop words                                | 90.1 (17.6) <sup>1</sup> | 81.0 (6.1) <sup>4</sup>  | 83.0 (22.4)              |
|                              | Stroop color-word                           | 41.7 (7.6) <sup>1</sup>  | 33.3 (4.2) <sup>4</sup>  | 36.8 (11.0)              |
| Verbal memory                | AVLT immediate trials sum                   | 51.0 (9.9) <sup>3</sup>  | 46.8 (5.7)               | 38.8 (17.2)              |
|                              | AVLT delay trial                            | 9.6 (2.8) <sup>3</sup>   | 10.0 (3.2)               | 9.3 (3.3)                |
|                              | WCS perseverative errors <sup>a</sup>       | 8.2 (2.5) <sup>3*</sup>  | 13.0 (3.0) <sup>4</sup>  | 6.8 (1.7) <sup>*</sup>   |
| Executive functioning        | WCS categories completed                    | 3.0 (1.8) <sup>3</sup>   | 1.7 (1.2) <sup>4</sup>   | 3.8 (1.0) <sup>*</sup>   |
|                              | Semantic fluency                            | 36.8 (10.5) <sup>1</sup> | 30.5 (8.9)               | 21.5 (7.9)               |
|                              | Phonemic fluency                            | 33.1 (12.6) <sup>1</sup> | 31.5 (5.7)               | 35.3 (7.3)               |
|                              | CPT-IP D-prime (2 digit)                    | 3.3 (0.4) <sup>2</sup>   | 2.9 (1.2) <sup>4</sup>   | 3.1 (0.3)                |
|                              | CPT-IP D-prime (3 digit)                    | 3.0 (0.7) <sup>2</sup>   | 1.9 (1.3) <sup>4</sup>   | 1.9 (0.9)                |
| Attention and Working Memory | CPT-IP D-prime (4 digit)                    | 1.9 (0.8) <sup>2</sup>   | 0.9 (0.4) <sup>4</sup>   | 1.1 (0.4) <sup>4</sup>   |
|                              | CPT-IP reaction time (2 digit) <sup>a</sup> | 433 (60) <sup>2</sup>    | 462 (81) <sup>4</sup>    | 424 (61)                 |
|                              | CPT-IP reaction time (3 digit) <sup>a</sup> | 445 (41) <sup>2</sup>    | 474 (81) <sup>4</sup>    | 496 (83)                 |
|                              | CPT-IP reaction time (4 digit) <sup>a</sup> | 457 (65) <sup>2</sup>    | 471 (85) <sup>4</sup>    | 512 (144) <sup>4</sup>   |
|                              | Letter number sequencing                    | 14.4 (4.7) <sup>1</sup>  | 13.3 (3.3)               | 11.3 (4.6)               |
|                              | 1-back number correct                       | 65.9 (18.0) <sup>2</sup> | 42.7 (19.4) <sup>4</sup> | 48.7 (12.4) <sup>4</sup> |
|                              | 2-back number correct                       | 53.1 (23.4) <sup>2</sup> | 21.7 (12.3) <sup>4</sup> | 43.5 (24.7) <sup>5</sup> |
|                              | Trails B <sup>a</sup>                       | 69.9 (37.8) <sup>1</sup> | 72.0 (13.5) <sup>4</sup> | 106.8 (52.6)             |

<sup>a</sup> higher scores indicate greater impairment

n=10 for open label glycine and 4 for double blind glycine and for placebo, unless noted

<sup>1</sup> n=9, <sup>2</sup> n=7, <sup>3</sup> n=8, <sup>4</sup> n=3, <sup>5</sup> n=2

\* p<0.05 vs double blind glycine.

**Supplemental Table 2** Mean (and SD) endpoint change and effect sizes for neuropsychological functioning measures<sup>1</sup>.

| Domain                          | Study<br>Treatment<br>Measure          | Open-label<br>Glycine<br>(n=5) |                       | Glycine<br>(n=3)         |                       | Double-blind<br>Placebo<br>(n=2) |                       | Between<br>Groups<br>ES |
|---------------------------------|----------------------------------------|--------------------------------|-----------------------|--------------------------|-----------------------|----------------------------------|-----------------------|-------------------------|
|                                 |                                        | Change<br>Mean (SD)            | Within<br>Group<br>ES | Change<br>Mean (SD)      | Within<br>Group<br>ES | Change<br>Mean (SD)              | Within<br>Group<br>ES |                         |
|                                 |                                        | Processing speed               | Trails A              | -1 (2)                   | -0.26                 | -6 (11) <sup>2</sup>             | -0.61                 |                         |
|                                 | Stroop colors <sup>a</sup>             | -8.2 (8.5) <sup>*</sup>        | -0.96                 | -6.5 (7.8) <sup>2</sup>  | -0.84                 | -3.5 (0.7)                       | -4.95                 | -0.47                   |
|                                 | Stroop words <sup>a</sup>              | -4.0 (6.6)                     | -0.60                 | -6.0 (8.5) <sup>2</sup>  | -0.71                 | 3.5 (7.8)                        | 0.45                  | -1.15                   |
|                                 | Stroop color-word <sup>a</sup>         | -2.6 (6.3)                     | -0.41                 | -7.5 (2.1) <sup>2</sup>  | -3.54                 | -5.0 (1.4)                       | -3.54                 | -1.31                   |
| Verbal memory                   | AVLT immediate trials sum <sup>a</sup> | -5.4 (7.1)                     | -0.76                 | -7.0 (7.2)               | -0.97                 | -5.5 (2.1)                       | -2.59                 | -0.25                   |
|                                 | AVLT delay trial <sup>a</sup>          | -2.0 (2.3)                     | -0.85                 | -1.7 (1.2)               | -1.44                 | -1.5 (0.7)                       | -2.12                 | -0.16                   |
|                                 | WCS perseverative errors               | -2.2 (1.7) <sup>1*</sup>       | -1.32                 | 7.5 (3.5) <sup>2</sup>   | 2.12                  | 4.0 (2.8)                        | 1.41                  | 1.09                    |
| Executive functioning           | WCS categories completed <sup>a</sup>  | -0.5 (0.6) <sup>1</sup>        | -0.87                 | -2.0 (0.0) <sup>2†</sup> | <-10                  | 0.0 (1.4)                        | 0.00                  | -2.00                   |
|                                 | Semantic fluency <sup>a</sup>          | -0.8 (2.6)                     | -0.31                 | -11.0 (7.2)              | -1.53                 | -1.5 (0.7)                       | -2.12                 | -1.61                   |
|                                 | Phonemic fluency <sup>a</sup>          | -5.4 (8.8)                     | -0.61                 | -1.7 (6.7)               | -0.25                 | -2.5 (10.6)                      | -0.24                 | 0.10                    |
|                                 | CPT-IP D-prime (2 digit) <sup>a</sup>  | -0.5 (0.5) <sup>1</sup>        | -0.90                 | -0.3 (0.1) <sup>2</sup>  | -4.60                 | -1.0 <sup>3†</sup>               |                       | 12.4 <sup>†</sup>       |
|                                 | CPT-IP D-prime (3 digit) <sup>a</sup>  | -0.1 (0.1) <sup>1</sup>        | -0.50                 | -0.7 (0.0) <sup>2*</sup> | -16.3                 | 0.4 <sup>3†</sup>                |                       | -26.6 <sup>†</sup>      |
|                                 | CPT-IP D-prime (4 digit) <sup>a</sup>  | 0.2 (0.5) <sup>1</sup>         | 0.40                  | -0.7 (0.3) <sup>2</sup>  | -2.29                 | 0.2 <sup>3†</sup>                |                       | -2.90 <sup>†</sup>      |
|                                 | CPT-IP reaction time (2 digit)         | 5 (30) <sup>1</sup>            | 0.17                  | -32 (74) <sup>2</sup>    | -0.44                 | 57 <sup>3†</sup>                 |                       | -1.21 <sup>†</sup>      |
| Attention and<br>Working Memory | CPT-IP reaction time (3 digit)         | -7 (55) <sup>1</sup>           | -0.12                 | -24 (76) <sup>2</sup>    | -0.31                 | 11 <sup>3†</sup>                 |                       | -0.46 <sup>†</sup>      |
|                                 | CPT-IP reaction time (4 digit)         | 52 (74) <sup>1</sup>           | 0.70                  | 3 (44) <sup>2</sup>      | 0.07                  | -58 <sup>3†</sup>                |                       | 1.39 <sup>†</sup>       |
|                                 | Letter number sequencing <sup>a</sup>  | -1.0 (2.0)                     | -0.50                 | 0.0 (2.0)                | 0.00                  | -2.5 (0.7)                       | -3.54                 | 1.49                    |
|                                 | 1-back number correct <sup>a</sup>     | 4.8 (16.3) <sup>1</sup>        | 0.29                  | -1.7 (6.7) <sup>2</sup>  | -0.25                 | -1 <sup>3†</sup>                 |                       | -0.49 <sup>†</sup>      |
|                                 | 2-back number correct <sup>a</sup>     | 8.0 (31.0) <sup>1</sup>        | 0.26                  | -5.5 (9.2) <sup>2</sup>  | -0.60                 | 6 <sup>3†</sup>                  |                       | -2.04 <sup>†</sup>      |
|                                 | Trails B                               | -8 (12)                        | -0.66                 | 4 (16) <sup>2</sup>      | 0.28                  | -28 (29)                         | -0.95                 | 1.50                    |

Patients were tested at baseline and at 8 weeks in the open-label study and at 12 weeks in the placebo-controlled study.

ES -- effect size. Negative change scores and ESs indicates improvement; negative between groups ES greater improvement with glycine than placebo. <sup>a</sup> sign reversed so that improvement appears as negative

n=5 for open label glycine, n=3 for double blind glycine, and n=2 for placebo, unless noted

<sup>1</sup> n=4, <sup>2</sup> n=2, <sup>3</sup> n=1. \* p<0.05 or † not calculable, paired or Student's t-test as appropriate. Within group ES not calculable when n=1.

**Supplemental Table 3** Mean (and SD) baseline vital signs and weight.

| Study<br>Treatment | Open-label                  | Double-blind     |                  |
|--------------------|-----------------------------|------------------|------------------|
|                    | Glycine (n=10) <sup>1</sup> | Glycine (n=4)    | Placebo (n=4)    |
| Measure            | <u>Mean (SD)</u>            | <u>Mean (SD)</u> | <u>Mean (SD)</u> |
| Systolic BP        | 119 (20)                    | 115 (6)          | 115 (16)         |
| Diastolic BP       | 71 (10)                     | 63 (3)           | 62 (7)           |
| Pulse              | 68 (9)                      | 83 (18)          | 67 (12)          |
| Weight, kg         | 81.4 (38.5)                 | 53.6 (5.2)       | 58.1 (13.8)      |

All comparisons n.s.

1 n=9 for weight

**Supplemental Table 4** Mean (and SD) baseline laboratory values.

| Study<br>Treatment | Open-label               | Double-blind  |               |
|--------------------|--------------------------|---------------|---------------|
|                    | Glycine (n=9)            | Glycine (n=2) | Placebo (n=1) |
| Measure            | Mean (SD)                | Mean (SD)     | Mean (SD)     |
| WBC                | 6.5 (1.9)                | 10.2 (0.1)    | 5.0           |
| Hemoglobin         | 14.3 (1.4)               | 15.0 (0.9)    | 16.7          |
| Glucose            | 93.1 (20.8) <sup>1</sup> | 95.5 (20.5)   | 88.0          |
| BUN                | 14.9 (5.6) <sup>1</sup>  | 10.5 (2.1)    | 11.0          |
| Creatinine         | 0.89 (0.16) <sup>1</sup> | 1.00 (0.14)   | 1.20          |
| Sodium             | 140 (1) <sup>1</sup>     | 142 (3)       | 142           |
| Potassium          | 4.4 (0.5) <sup>1</sup>   | 4.7 (0.1)     | 5.0           |
| Chloride           | 104 (2) <sup>1</sup>     | 104 (2)       | 101           |
| Bicarbonate        | 25.6 (2.7) <sup>1</sup>  | 24.5 (2.1)    | 31.0          |
| Calcium            | 9.3 (0.7)                | 9.8 (0.4)     | 9.5           |
| AST                | 20 (14) <sup>1</sup>     | 16 (4)        | 19            |
| ALT                | 24 (11) <sup>1</sup>     | 16 (5)        | 16            |
| GGT                | 20 (9) <sup>1</sup>      |               |               |
| Bilirubin          | 0.5 (0.1) <sup>1</sup>   | 1.4 (1.1)     | 0.9           |
| Albumin            | 4.6 (0.3) <sup>1</sup>   | 5.2 (0.1)     | 5.4           |
| Cholesterol        | 161 (21) <sup>1</sup>    |               |               |
| Triglycerides      | 95 (41) <sup>1</sup>     |               |               |

<sup>1</sup> n=8. Blank cells indicate laboratory test not acquired.

**Supplemental Table 5** Effect sizes and mean (and SD) endpoint change in laboratory values.

| Study<br>Treatment | Open-label               |                       | Double-blind        |                       |                  | Between<br>Groups<br>ES |
|--------------------|--------------------------|-----------------------|---------------------|-----------------------|------------------|-------------------------|
|                    | Glycine<br>(n=9)         | Within<br>Group<br>ES | Glycine<br>(n=2)    | Within<br>Group<br>ES | Placebo<br>(n=1) |                         |
| Measure            | Change<br>Mean (SD)      |                       | Change<br>Mean (SD) |                       | Change           |                         |
| WBC                | 0.2 (2.0)                | 0.08                  | -3.1 (0.1)*         | -31.1                 | -0.2             | -28.5                   |
| Hemoglobin         | -0.3 (0.8)               | -0.40                 | 0.9 (1.0)           | 0.91                  | 1.7              | -0.81                   |
| Glucose            | -5.0 (20.4) <sup>1</sup> | -0.25                 | -1.0 (21.2)         | -0.05                 | 2.0              | -0.14                   |
| BUN                | 1.6 (7.4) <sup>1</sup>   | 0.22                  | -1.0 (2.8)          | -0.35                 | 6.0              | -2.47                   |
| Creatinine         | 0.05 (0.11) <sup>1</sup> | 0.47                  | -0.05 (0.07)        | -0.71                 | 0.00             | -0.71                   |
| Sodium             | 0 (2) <sup>1</sup>       | 0.21                  | -2 (1)              | -2.12                 | -1               | -0.70                   |
| Potassium          | -0.2 (0.4) <sup>1</sup>  | -0.67                 | -0.4 (0.2)          | -2.67                 | 0.4              | -5.56                   |
| Chloride           | 0 (3) <sup>1</sup>       | -0.08                 | -1 (0)              | -3.07                 | -1               | 0.00                    |
| Bicarbonate        | -1.6(3.8) <sup>1</sup>   | -0.43                 | 0.0 (1.4)           | 0.00                  | -3.0             | 2.13                    |
| Calcium            | 0.1 (0.5)                | 0.22                  | 0.3 (0.8)           | 0.35                  | 0.9              | -0.71                   |
| AST                | -3 (9) <sup>1</sup>      | -0.31                 | -1 (1)              | -0.71                 | 1                | -1.42                   |
| ALT                | -7 (10) <sup>1</sup>     | -0.67                 | -4 (1)              | -6.36                 | 7                | -16.2                   |
| GGT                | -2 (3) <sup>1</sup>      | -0.76                 |                     |                       |                  |                         |
| Bilirubin          | 0.0 (0.1) <sup>1</sup>   | 0.00                  | -0.2 (0.3)          | -0.71                 | 0.1              | -1.07                   |
| Albumin            | 0.0 (0.1) <sup>1</sup>   | -0.27                 | 0.1 (0.1)           | 0.71                  | 0.2              | -0.71                   |
| Cholesterol        | -8 (23) <sup>1</sup>     | -0.37                 |                     |                       |                  |                         |
| Triglycerides      | 4 (55) <sup>1</sup>      | 0.07                  |                     |                       |                  |                         |

\* p<0.05, paired t-test. Within paired and Student's t's not calculable when n=1.

<sup>1</sup> n=8. Blank cells indicate laboratory test not acquired.

Within group ES, paired t-test, and Student's t-test not calculable when n=1.
